# Supplementary material for: Use of Distal Tibial Cortical Bone Thickness and FRAX Score for Further Treatment Planning in Patients with Trimalleolar Ankle Fractures
Source: MDPI journal article supplement (doi:10.3390/jcm12113666), 2023-05-25
Supplement: s1 [file s1]

## Supplements

Table S1: Multivariable regression analysis with ROI<sub>1</sub> as the dependent endpoint.

| Independent variable | Regression coefficient | p-value | 95%CI             |
|----------------------|------------------------|---------|-------------------|
| Age                  | -2.325                 | <0.001  | [-3.083; -1.565]  |
| Sex: female          | -18.02                 | 0.241   | [-48.248; 12.217] |
| BMI                  | 1.089                  | 0.263   | [-0.826; 3.005]   |
| No alcohol abuse     | 22.827                 | 0.228   | [-14.40; 60.055]  |

Table S2: Multivariable regression analysis with ROI<sub>2</sub> as the dependent endpoint.

| Independent variable | Regression coefficient | p-value | 95%CI             |
|----------------------|------------------------|---------|-------------------|
| Age                  | -0.821                 | 0.002   | [-1.331; -0.311]  |
| Sex: female          | -28.423                | 0.008   | [-49.320; -7.524] |
| No alcohol abuse     | 22.471                 | 0.096   | [-4.014; 48.957]  |
